# Supplementary material for: Respiratory and Gut Microbiome Modification during Respiratory Syncytial Virus Infection: A Systematic Review
Source: MDPI journal article supplement (doi:10.3390/v16020220), 2024-01-31
Supplement: s1 [file s1]

**Table S1.** Risk of bias for each study.

| First author<br>(Year)                               | Selection of<br>participants | Confounding<br>variables | Measurement of<br>exposure | Binding of<br>outcome<br>assessments | Incomplete<br>outcome data | Selective<br>outcome<br>reporting |
|------------------------------------------------------|------------------------------|--------------------------|----------------------------|--------------------------------------|----------------------------|-----------------------------------|
| Alba C, et al.<br>(2021) [29]                        | Low                          | Unclear                  | Low                        | Low                                  | Low                        | Unclear                           |
| Rajagopala SV,<br>et al. (2021) [36]                 | Low                          | Unclear                  | Low                        | Low                                  | Low                        | Unclear                           |
| Grier A, et al.<br>(2020) [32]                       | Low                          | Low                      | Low                        | Low                                  | Low                        | Unclear                           |
| Mansbach JM, et<br>al. (2020) [35]                   | Low                          | Unclear                  | Low                        | Low                                  | Low                        | Unclear                           |
| Schippa S, et al<br>(2020) [39]                      | Low                          | Unclear                  | Low                        | Low                                  | Low                        | Unclear                           |
| Zhang X, et al.<br>(2020) [26]                       | Low                          | Unclear                  | Low                        | Low                                  | Low                        | Unclear                           |
| Ederveen THA,<br>et al. (2018) [31]                  | Low                          | Unclear                  | Low                        | Low                                  | Low                        | Unclear                           |
| Rosas-Salazar C,<br>et al. (2018) [37]               | Low                          | Unclear                  | Low                        | Low                                  | Low                        | Unclear                           |
| de Steenhuijsen<br>Piters WAA, et<br>al. (2016) [30] | Low                          | Unclear                  | Low                        | Low                                  | Low                        | Unclear                           |
| Mansbach JM, et<br>al. (2016) [34]                   | Low                          | Unclear                  | Low                        | Low                                  | Low                        | Unclear                           |
| Russell MM, et<br>al. (2022) [38]                    | Low                          | Unclear                  | Low                        | Low                                  | Low                        | Unclear                           |
| Harding JN, et<br>al. (2020) [33]                    | Low                          | Unclear                  | Low                        | Low                                  | Low                        | Unclear                           |

**Table S2.** Main characteristics of included studies in the respiratory tract microbiome compared to patients other than healthy controls.

| First author<br>(Year)                    | Country | Age cate-<br>gory | Number of patients<br>with RSV infection                                                                                  | Number of controls                                                                                                            | Type of sam-<br>ples                         | Diagnostic<br>method<br>for RSV<br>infection | Microbiome<br>approach,<br>pipeline and<br>database |
|-------------------------------------------|---------|-------------------|---------------------------------------------------------------------------------------------------------------------------|-------------------------------------------------------------------------------------------------------------------------------|----------------------------------------------|----------------------------------------------|-----------------------------------------------------|
| Mansbach<br>JM, et al.<br>(2020) [35]     | USA     | < 1 year          | 690<br>(RSV positive at in-<br>dex)<br>(196 [Recurrent<br>wheezing by 36 mo],<br>494 [No recurrent<br>wheezing by 36 mo]) | 152<br>(RSV negative at in-<br>dex)<br>(83 [Recurrent<br>wheezing by 36<br>mo],<br>69 [No recurrent<br>wheezing by 36<br>mo]) | Nasopharyn-<br>geal aspirate                 | PCR                                          | 16S rRNA (V4)<br>USEARCH<br>SILVA                   |
| Zhang X, et<br>al. (2020) [26]            | China   | < 6 months        | 26<br>(RSV-positive infants<br>who later developed<br>recurrent wheezing)                                                 | 48<br>(RSV-positive in-<br>fants who did not<br>develop recurrent<br>wheezing)                                                | Sputum (blind<br>nasotracheal<br>aspiration) | PCR                                          | 16S rRNA (V4-<br>V5)<br>QIIME<br>SILVA              |
| Rosas-Salazar<br>C, et al.<br>(2018) [37] | USA     | < 1 year          | 82<br>(Subsequent or recur-<br>rent wheeze)                                                                               | 31<br>(No wheeze)                                                                                                             | Nasal wash                                   | PCR                                          | 16S rRNA (V4)<br>Mothur<br>YAP                      |

Mansbach  
JM, et al.  
(2016) [34]

USA

< 1 year

580  
(RSV only)

(RSV/HRV coinfection),  
60  
(HRV only)

Nasopharyngeal aspirate

PCR

16S rRNA (V4)  
USEARCH  
SILVA

DFA, direct immunofluorescence antibody; HRV, human rhino virus; PCR, polymerase chain reaction; QIIME, Quantitative Insights Into Microbial Ecology; RDP, ribosomal database project; rRNA, ribosomal RNA; USA, the United States of America; YAP, Yet Another Pipeline.

**Table S3.** Respiratory tract taxa (microbiome) in patients with RSV infection compared to patients other than healthy controls.

| Phylum                  | Class                                        | Order                                                     | Family                                 | Genus                                                                                                                                                                                         | Species                                                                                                                                                              |
|-------------------------|----------------------------------------------|-----------------------------------------------------------|----------------------------------------|-----------------------------------------------------------------------------------------------------------------------------------------------------------------------------------------------|----------------------------------------------------------------------------------------------------------------------------------------------------------------------|
| Proteobacteria ↑<br>(↓) | Alphaproteobacteria ↑<br>Gammaproteobacteria | Pseudomonadales ↑<br>Rhizobiales ↑<br>Pasteurellales<br>↑ | Rhizobiaceae ↑<br>Pasteurellaceae<br>↑ | <i>Haemophilus</i> ↑↑ (↓)<br><i>Moraxella</i> ↑↑↑ (↓)<br><i>Streptococcus</i> ↑↑ (↑)<br><i>Corynebacterium</i> ↑<br><i>Klebsiella</i> ↑<br><i>Phylobacterium</i> ↑<br><i>Dolosigranulum</i> ↑ | <i>Haemophilus influenzae</i> ( <i>Haemophilus</i> sp.) ↑<br><i>Moraxella catarrhalis</i> ↑<br><i>Klebsiella pneumoniae</i> ↑<br><i>Alpha proteobacteria</i> A0839 ↑ |

↑, the taxa increased in patients who developed recurrent wheezing compared to patients who did not; (↑↓), the taxa increased (decreased) in patients with RSV-only compared to patients with HRV-only or RSV/HRV co-infection; HRV, human rhino virus; RSV, respiratory syncytial virus.
